# Supplementary material for: Discovery of Strong 3-Nitro-2-Phenyl-2H-Chromene Analogues as Antitrypanosomal Agents and Inhibitors of Trypanosoma cruzi Glucokinase
Source: MDPI journal article supplement (doi:10.3390/ijms25084319), 2024-04-13
Supplement: s1 [file s1]

## Supplementary Information

### Discovery of Strong 3-Nitro-2-Phenyl-2*H*-Chromene Analogues as Antitrypanosomal Agents and Inhibitors of *Trypanosoma cruzi* Glucokinase

Shane M. Carey,<sup>a,c</sup> Destiny M. O'Neill,<sup>a,c</sup> Garrett B. Conner,<sup>a</sup> Julian Sherman,<sup>b</sup>

Ana Rodriguez,<sup>b</sup> and Edward L. D'Antonio<sup>a,\*</sup>

<sup>a</sup> Department of Natural Sciences, University of South Carolina Beaufort, 1 University Boulevard,  
Bluffton, South Carolina 29909, USA

<sup>b</sup> Department of Microbiology, New York University School of Medicine, 430 East 29<sup>th</sup> Street,  
New York, New York 10016, USA

<sup>c</sup> Authors contributed equally to this work.

\* To whom correspondence should be addressed:

Prof. Edward L. D'Antonio, Ph.D.  
Department of Natural Sciences  
University of South Carolina Beaufort  
1 University Boulevard  
Bluffton, South Carolina 29909  
United States of America  
Tel.: +1 843-208-8101  
E-mail: [edantonio@uscb.edu](mailto:edantonio@uscb.edu)

## Table of Contents

|             |                                                                                                                                                                                                         |           |
|-------------|---------------------------------------------------------------------------------------------------------------------------------------------------------------------------------------------------------|-----------|
| <b>I.</b>   | <b>Chemical Structures of the 3-Nitro-2-Phenyl-2<i>H</i>-Chromene Analogues</b>                                                                                                                         |           |
| <b>a.</b>   | <b>Table S1.</b> Systematic Names of Compounds <b>1 – 13</b> .....                                                                                                                                      | <b>S3</b> |
| <b>b.</b>   | <b>Table S2.</b> SMILES Codes of Compounds <b>1 – 13</b> .....                                                                                                                                          | <b>S4</b> |
| <b>II.</b>  | <b>Biological Assays</b>                                                                                                                                                                                |           |
| <b>a.</b>   | <b>Figure S1.</b> <i>In vitro</i> dose – response of compound activity ( <b>1 – 13</b> ) on <i>Trypanosoma cruzi</i> (Tulahuen strain) infective form co-cultured in mammalian NIH-3T3 fibroblasts..... | <b>S5</b> |
| <b>b.</b>   | <b>Figure S2.</b> <i>In vitro</i> dose – response of compound activity ( <b>1 – 13</b> ) on <i>Trypanosoma brucei brucei</i> (427 strain) bloodstream form.....                                         | <b>S6</b> |
| <b>c.</b>   | <b>Figure S3.</b> <i>In vitro</i> dose – response of compound activity ( <b>1 – 12</b> ) on mammalian NIH-3T3 fibroblasts in order to assess cytotoxicity.....                                          | <b>S7</b> |
| <b>III.</b> | <b>Reference</b> .....                                                                                                                                                                                  | <b>S8</b> |

## I. Chemical Structures of the 3-Nitro-2-Phenyl-2H-Chromene Analogues

### a. Systematic Names of Compounds 1 – 13.

**Table S1.** The systematic names for 3-nitro-2-phenyl-2H-chromene analogues **1 – 13**.

| Compound  | Systematic Name <sup>a</sup>                                       |
|-----------|--------------------------------------------------------------------|
| <b>1</b>  | 6-Bromo-2-(4-ethoxy-3-methoxyphenyl)-3-nitro-2H-chromene           |
| <b>2</b>  | 6-Bromo-2-(3,4-diethoxyphenyl)-3-nitro-2H-chromene                 |
| <b>3</b>  | 6-Bromo-2-(3,4-dimethoxyphenyl)-8-methoxy-3-nitro-2H-chromene      |
| <b>4</b>  | 6-Bromo-2-(3,4-dimethoxyphenyl)-3-nitro-2H-chromene                |
| <b>5</b>  | 6,8-Dibromo-2-(3,4-dimethoxyphenyl)-3-nitro-2H-chromene            |
| <b>6</b>  | 6,8-Dibromo-2-(4-ethoxy-3-methoxyphenyl)-3-nitro-2H-chromene       |
| <b>7</b>  | 2-(2,6-Dichlorophenyl)-6,8-dibromo-3-nitro-2H-chromene             |
| <b>8</b>  | 6-Bromo-2-(4-ethoxy-3-methoxyphenyl)-8-methoxy-3-nitro-2H-chromene |
| <b>9</b>  | 6,8-Dichloro-2-(3,4-diethoxyphenyl)-3-nitro-2H-chromene            |
| <b>10</b> | 2-(3,4-Diethoxyphenyl)-3-nitro-2H-chromene                         |
| <b>11</b> | 6-Bromo-2-(2-chlorophenyl)-3-nitro-2H-chromene                     |
| <b>12</b> | 2-(2-Chlorophenyl)-3-nitro-2H-chromene                             |
| <b>13</b> | 2-(2,6-Dichlorophenyl)-3-nitro-2H-chromene                         |

<sup>a</sup> Systematic names were generated through *ChemDraw Ultra 12.0* using a sketch of the compound.

**b. SMILES Codes for Compounds 1 – 13.**

**Table S2.** SMILES codes for the 3-nitro-2-phenyl-2*H*-chromene analogues (**1 – 13**).

| Compound  | SMILES Code <sup>a-c</sup>                                                 |
|-----------|----------------------------------------------------------------------------|
| <b>1</b>  | <chem>BrC=1C=C2C=C(C(OC2=CC1)C1=CC(=C(C=C1)OCC)OC)[N+](=O)[O-]</chem>      |
| <b>2</b>  | <chem>BrC=1C=C2C=C(C(OC2=CC1)C1=CC(=C(C=C1)OCC)OCC)[N+](=O)[O-]</chem>     |
| <b>3</b>  | <chem>BrC=1C=C2C=C(C(OC2=C(C1)OC)C1=CC(=C(C=C1)OC)OC)[N+](=O)[O-]</chem>   |
| <b>4</b>  | <chem>BrC=1C=C2C=C(C(OC2=CC1)C1=CC(=C(C=C1)OC)OC)[N+](=O)[O-]</chem>       |
| <b>5</b>  | <chem>BrC=1C=C2C=C(C(OC2=C(C1)Br)C1=CC(=C(C=C1)OC)OC)[N+](=O)[O-]</chem>   |
| <b>6</b>  | <chem>BrC=1C=C2C=C(C(OC2=C(C1)Br)C1=CC(=C(C=C1)OCC)OC)[N+](=O)[O-]</chem>  |
| <b>7</b>  | <chem>ClC1=C(C(=CC=C1)Cl)C1OC2=C(C=C(C=C2C=C1[N+](=O)[O-])Br)Br</chem>     |
| <b>8</b>  | <chem>BrC=1C=C2C=C(C(OC2=C(C1)OC)C1=CC(=C(C=C1)OCC)OC)[N+](=O)[O-]</chem>  |
| <b>9</b>  | <chem>ClC=1C=C2C=C(C(OC2=C(C1)Cl)C1=CC(=C(C=C1)OCC)OCC)[N+](=O)[O-]</chem> |
| <b>10</b> | <chem>C(C)OC=1C=C(C=CC1OCC)C1OC2=CC=CC=C2C=C1[N+](=O)[O-]</chem>           |
| <b>11</b> | <chem>BrC=1C=C2C=C(C(OC2=CC1)C1=C(C=CC=C1)Cl)[N+](=O)[O-]</chem>           |
| <b>12</b> | <chem>ClC1=C(C=CC=C1)C1OC2=CC=CC=C2C=C1[N+](=O)[O-]</chem>                 |
| <b>13</b> | <chem>ClC1=C(C(=CC=C1)Cl)C1OC2=CC=CC=C2C=C1[N+](=O)[O-]</chem>             |

<sup>a</sup> SMILES codes were generated through *OPSIN* (<https://opsin.ch.cam.ac.uk>) by entering the systematic names (see **Table S1**).

<sup>b</sup> Ref. Lowe et al. (1).

<sup>c</sup> Structures of compounds can be visualized by entering SMILES codes into the program *PubChem Sketcher* v2.4 (<https://pubchem.ncbi.nlm.nih.gov/edit3/index.html>).

## II. Biological Assays.

**a. Figure S1.** *In vitro* dose – response of compound activity (**1** – **13**) on *Trypanosoma cruzi* (Tulahuen strain) infective form co-cultured in mammalian NIH-3T3 fibroblasts. Data was collected in triplicate and the results are presented as  $IC_{50}$  plots shown as percent growth inhibition as a function of log ([compound]).

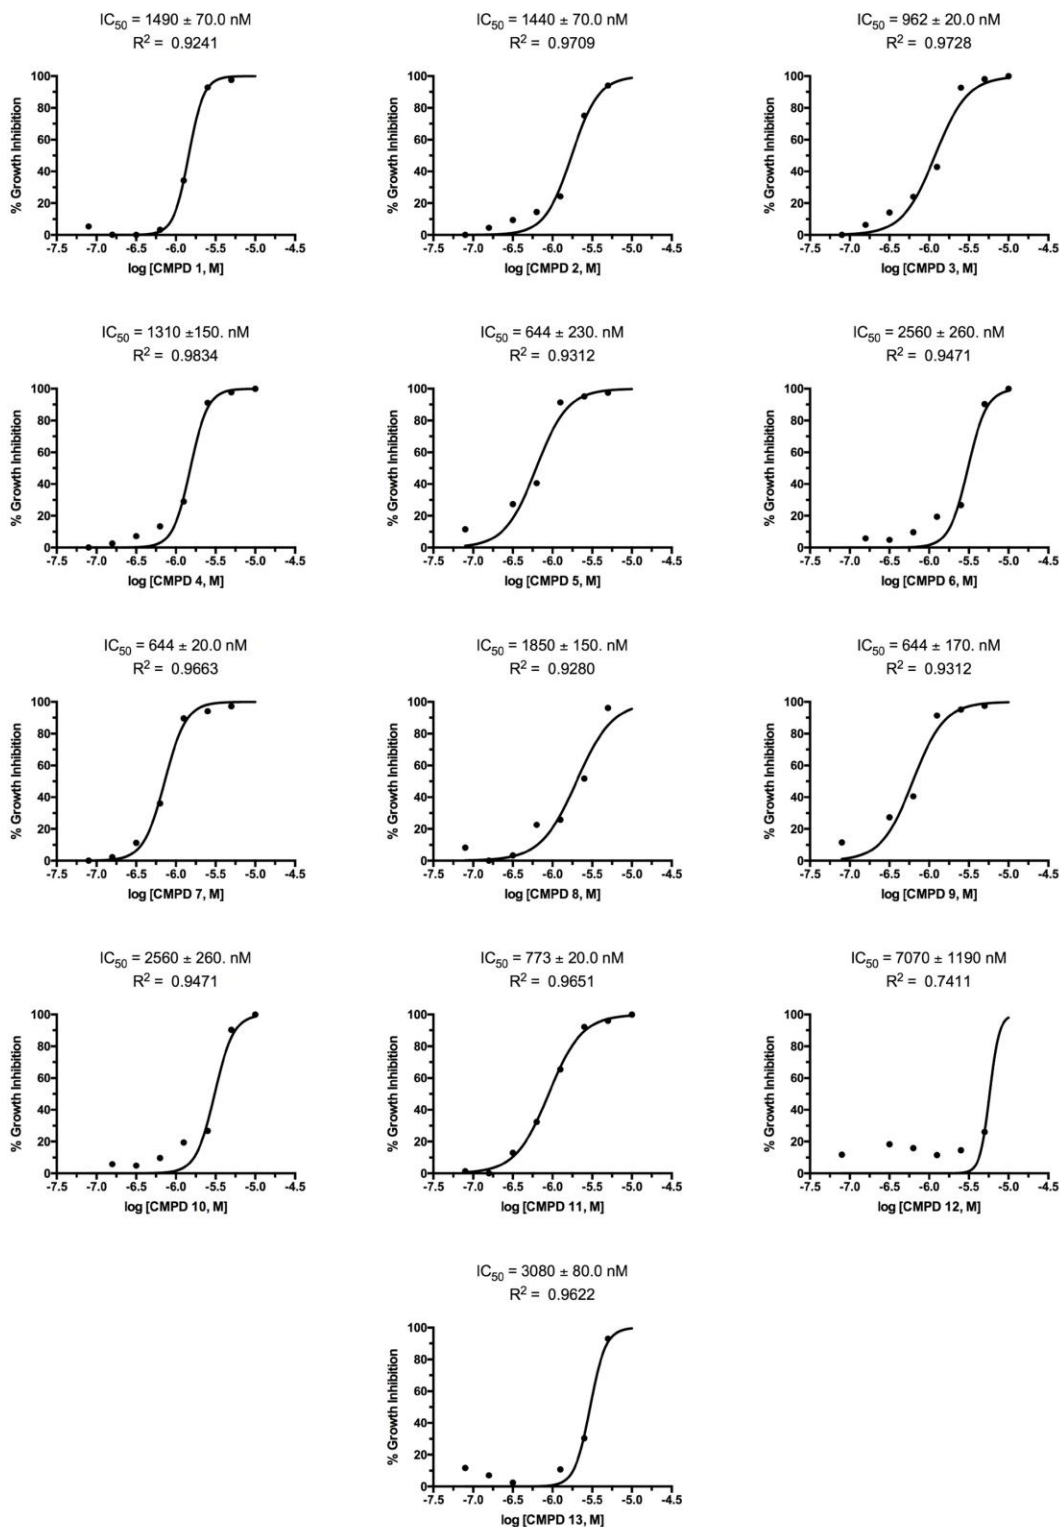

**b. Figure S2.** *In vitro* dose – response of compound activity (**1** – **13**) on *Trypanosoma brucei brucei* (427 strain) bloodstream form. Data was collected in triplicate and the results are presented as IC<sub>50</sub> plots shown as percent growth inhibition as a function of log ([compound]).

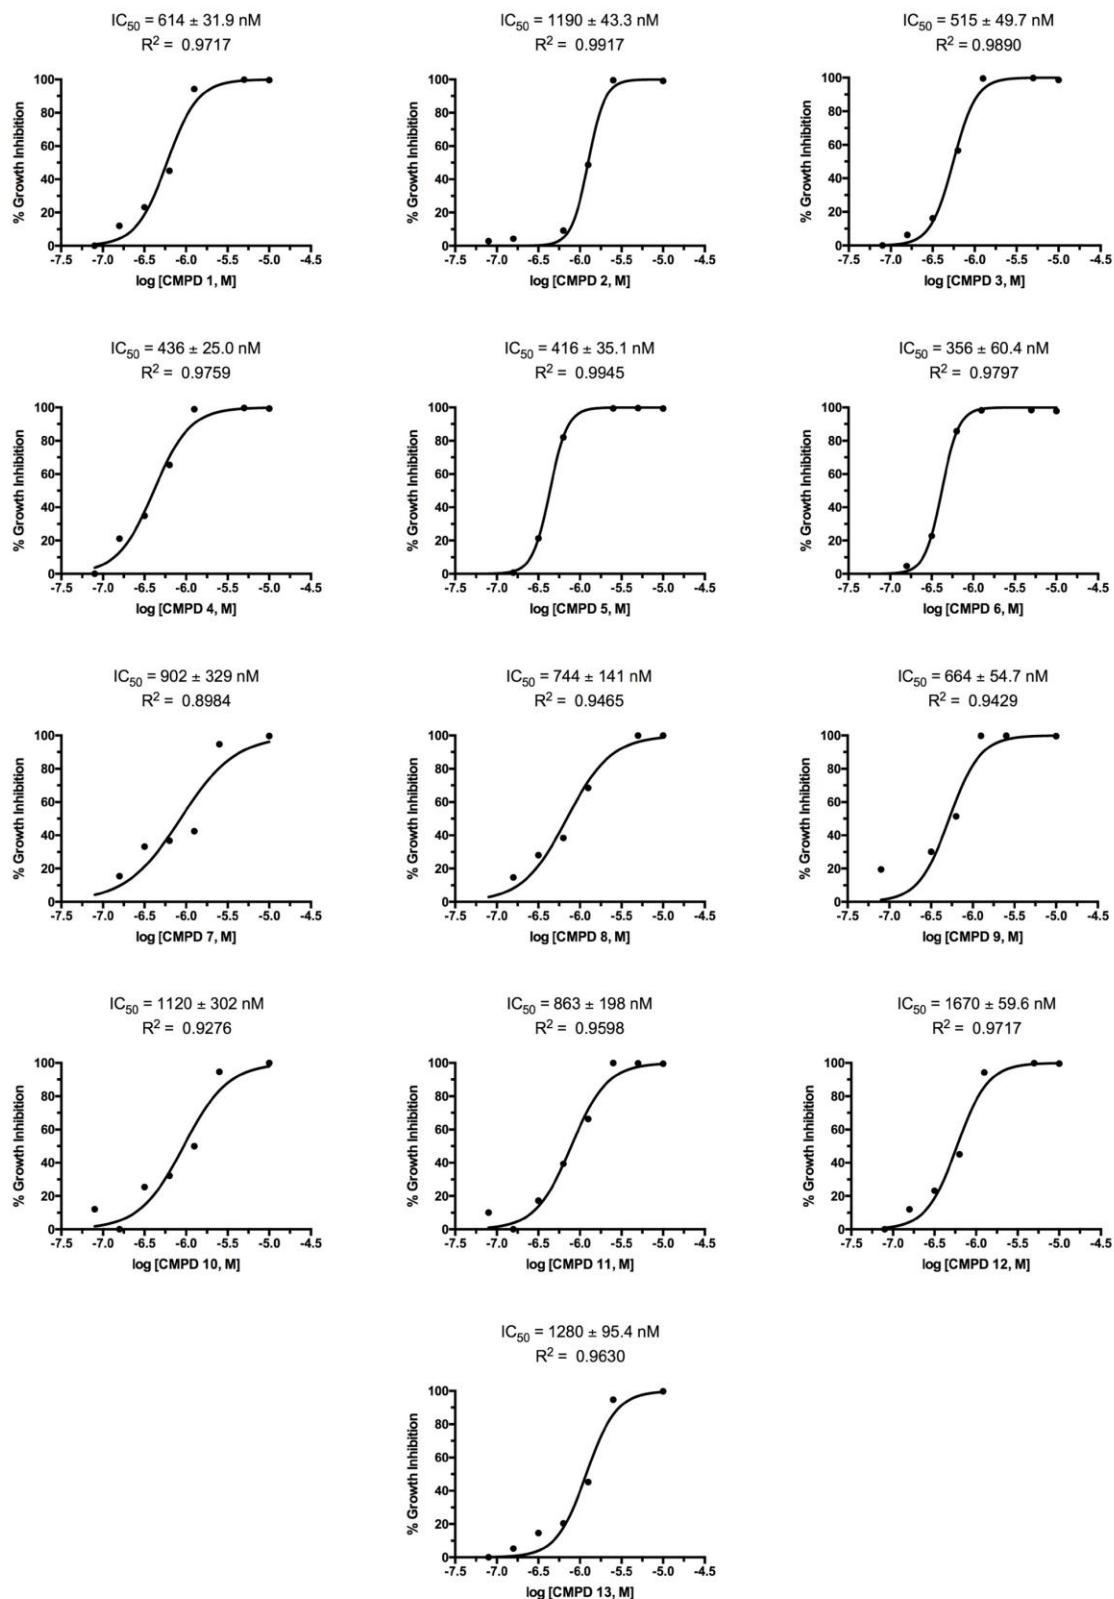

**c. Figure S3.** *In vitro* dose – response of compound activity (**1** – **12**) on mammalian NIH-3T3 fibroblasts in order to assess cytotoxicity. Data was collected in triplicate and the results are presented as TC<sub>50</sub> plots shown as percent growth inhibition as a function of log ([compound]). Note: Compound **13** was excluded due a poor fit to the sigmoidal curve.

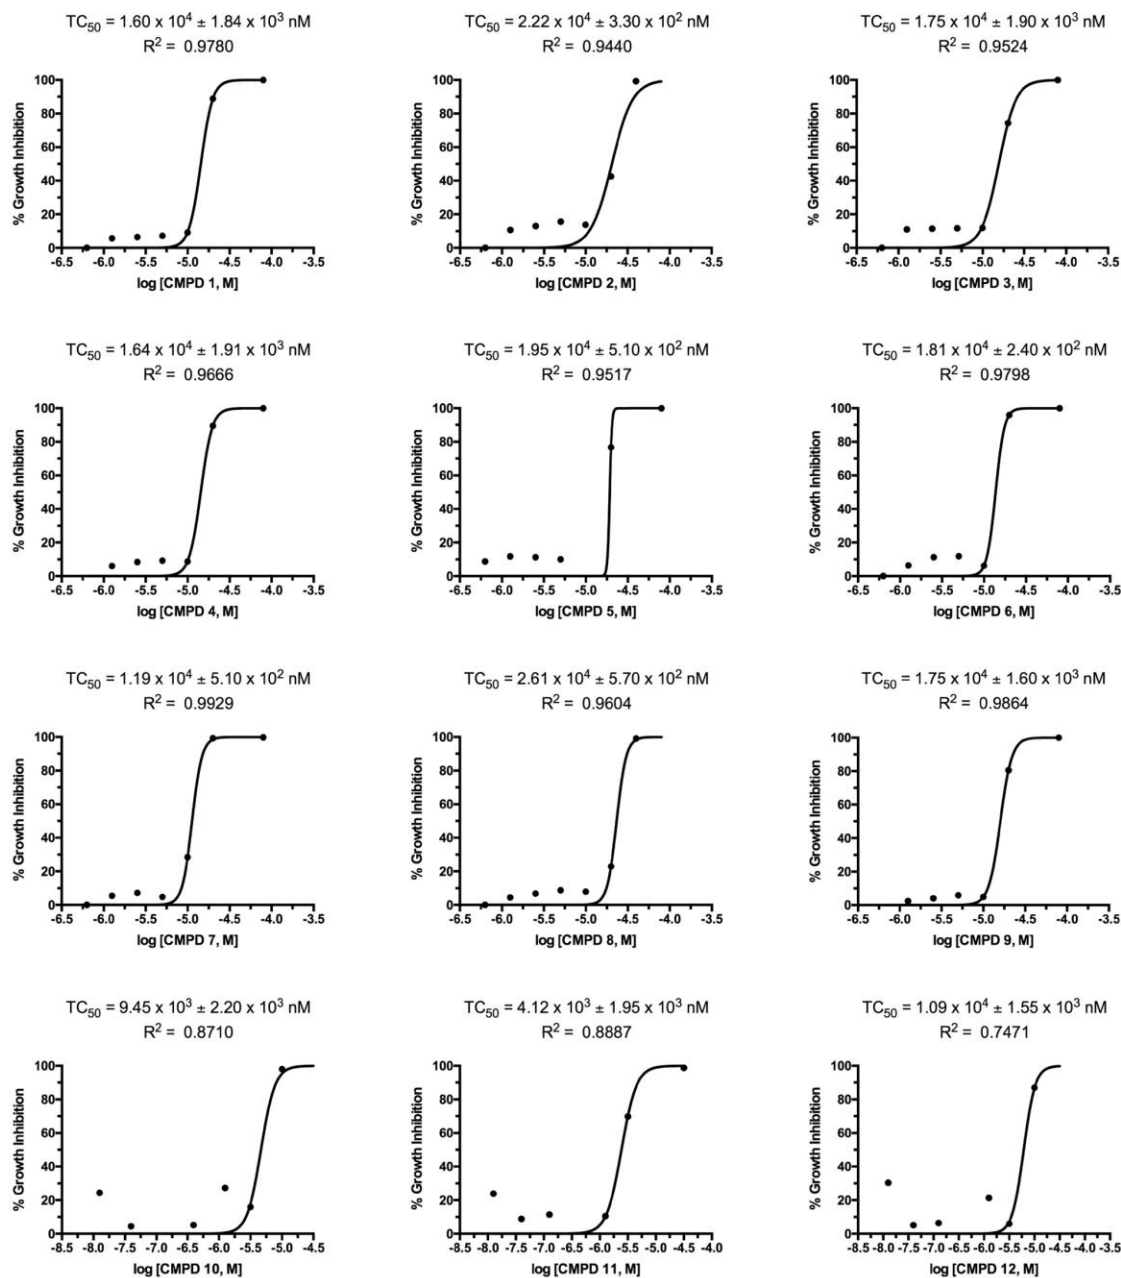

## Reference

- ([1.] Lowe, D. M., Corbett, P. T., Murray-Rust, P., and Glen, R. C. (2011) Chemical name to structure: OPSIN, an open source solution, *J. Chem. Inf. Model* 51, 739-753.
